# Supplementary material
Source: Royal Society of Chemistry journal article supplement (doi:10.1039/d6fo02286c)
Supplement: d6fo02286c1.pdf [file d6fo02286c1.pdf]

1 **Supplementary Table**

2 **Coordinated changes in microbiota features, short-chain fatty acids,**  
3 **and peripheral clocks accompany fructo-oligosaccharide-associated**  
4 **metabolic improvement**

5 Zhenting Zhao<sup>1</sup>, Junwei Zhang<sup>1</sup>, Pei Du<sup>1</sup>, Xinran Liu<sup>1</sup>, Jin Ye<sup>1</sup>, Renjie Shi<sup>1</sup>, Danna  
6 Wang<sup>1</sup>, Bing Xia<sup>1</sup>, Xuebo Liu<sup>1\*</sup>, Beita Zhao<sup>1\*</sup>

7 1 College of Food Science and Engineering, Northwest A&F University, Yangling  
8 712100, China

9 2 State Key Laboratory of Eco-hydraulics in Northwest Arid Region of China, School  
10 of Water Resources and Hydro-electric Engineering, Xi'an University of Technology,  
11 Xi'an 710048, Shaanxi, China.

12 \*Corresponding author: Xuebo Liu, Beita Zhao

13 Xuebo Liu, E-mail: xuebofood@nwafu.edu.cn

14 Beita Zhao, E-mail: beitzhao@nwafu.edu.cn

15

16 **Supplementary Table 1.** Primer sequences used for RT-qPCR analysis

|                | Forward (5'-3' sequence)  | Reverse (5'-3' sequence)  |
|----------------|---------------------------|---------------------------|
| <b>qPCR</b>    |                           |                           |
| <i>Ppara</i>   | ACAGGAGAGCAGGGATTTGC      | TACCTACGCTCAGCCCTCTT      |
| <i>Fasn</i>    | GGTGTGGTGGGTTTGGTGAATTGT  | TCACGAGGTCATGCTTTAGCACCT  |
| <i>Srebp1c</i> | AAGCAAATCACTGAAGGACCTGG   | AAAGACAAGGGGCTACTCTGGGAG  |
| <i>Pfk</i>     | GCTACCGTGGACCTGGAGAACTGC  | ACAGTCACTCGTGTATCGAAGCCCA |
| <i>G6pc</i>    | GGTTCATCCTTGTGTCTGTG      | GCTGTAGTAGTCGGTGTCC       |
| <i>Cd36</i>    | CACAGCTGCCTTCTGAAATGTGTGG | TTTCTACGTGGCCCGGTTCTAATTC |
| <i>Mttp</i>    | ATGATCCTCTTGGCAGTGCTT     | TGAGAGGCCAGTTGTGTGAC      |
| <i>Bmall</i>   | CCAAGAAAGTATGGACACAGACAAA | GCATTCTTGATCCTTCCTTGGT    |
| <i>Clock</i>   | AAGTCTTGGGAACATCAGGCTA    | GTCTGAAGCCATATCCACTGCT    |

17

18

19 **Supplementary Table 2.** MetaCycle (JTK\_CYCLE) rhythmicity parameters for  
 20 peripheral tissue gene expression, gut microbiota features, and short-chain fatty acids  
 21 across six zeitgeber time points

|                        | JTK<br><i>p</i> value | JTK<br>BH.Q    | JTK<br>period | JTK<br>adjphase | JTK<br>amplitude |
|------------------------|-----------------------|----------------|---------------|-----------------|------------------|
| <b>eWAT</b>            |                       |                |               |                 |                  |
| LFD_Bmal1              | 8.35E-08              | 5.40E-07       | 24            | 14              | 3.055686754      |
| HFD_Bmal1              | 5.60E-06              | 2.48E-05       | 24            | 14              | 0.937858397      |
| HFD+FOS_Bmal1          | 0.001922217           | 0.005208589    | 24            | 16              | 1.292047307      |
| LFD_Clock              | 0.000301974           | 0.001056907    | 24            | 14              | 1.144512144      |
| HFD_Clock              | 1                     | 1              | 20            | 14              | 0.439847208      |
| HFD+FOS_Clock_         | 0.069229071           | 0.129227599    | 24            | 14              | 0.262799107      |
| LFD_Srebp1c            | 1.17E-13              | 4.90E-12       | 24            | 16              | 1.982006716      |
| HFD_Srebp1c            | 9.34E-05              | 0.000356683    | 24            | 18              | 0.496168156      |
| HFD+FOS_Srebp1c        | 5.70E-13              | 9.57E-12       | 24            | 18              | 1.356784881      |
| LFD_Ppara $\alpha$     | 2.69E-06              | 1.26E-05       | 24            | 16              | 3.742782148      |
| HFD_Ppara $\alpha$     | 0.000301974           | 0.001056907333 | 20            | 0               | 0.048380741      |
| HFD+FOS_Ppara $\alpha$ | 0.318942565           | 0.461916818    | 24            | 16              | 1.270890655      |
| LFD_Fasn               | 1                     | 1              | 20            | 12              | 0.401643176      |
| HFD_Fasn               | 2.23E-05              | 8.93E-05       | 20            | 18              | 0.049739479      |
| HFD+FOS_Fasn           | 0.001697666           | 0.004753465    | 20            | 18              | 0.202381745      |
| <b>hepatic tissue</b>  |                       |                |               |                 |                  |
| LFD_Bmal1              | 0.002048068           | 0.005376178    | 20            | 4               | 0.372171219      |
| HFD_Bmal1              | 6.94E-07              | 3.64E-06       | 24            | 4               | 0.565482633      |

|                          |             |             |    |    |             |
|--------------------------|-------------|-------------|----|----|-------------|
| HFD+FOS_Bmal1            | 0.000525536 | 0.001765801 | 24 | 0  | 0.701612372 |
| LFD_Clock                | 3.05E-07    | 1.71E-06    | 20 | 2  | 0.466018638 |
| HFD_Clock                | 1.64E-08    | 1.26E-07    | 20 | 4  | 0.415212706 |
| HFD+FOS_Clock            | 4.75E-09    | 3.99E-08    | 20 | 2  | 0.722673188 |
| LFD_Srebp1c              | 0.485556756 | 0.668635533 | 20 | 6  | 0.510054203 |
| HFD_Srebp1c              | 1           | 1           | 20 | 6  | 0.315277724 |
| HFD+FOS_Srebp1c          | 1           | 1           | 20 | 6  | 0.266232112 |
| LFD_Pfk                  | 0.188276607 | 0.310102647 | 24 | 16 | 0.118695232 |
| HFD_Pfk                  | 0.188276607 | 0.310102647 | 24 | 18 | 0.123107057 |
| HFD+FOS_Pfk              | 0.005583941 | 0.012677055 | 24 | 12 | 0.807490771 |
| LFD_G6pc                 | 7.52E-16    | 6.32E-14    | 20 | 2  | 0.314700872 |
| HFD_G6pc                 | 1.85E-06    | 9.12E-06    | 20 | 2  | 0.044492553 |
| HFD+FOS_G6pc             | 5.70E-13    | 9.57E-12    | 20 | 2  | 0.263257958 |
| LFD_Ppara $\alpha$       | 0.00971662  | 0.020928105 | 24 | 12 | 0.817188434 |
| HFD_Ppara $\alpha$       | 0.000785586 | 0.002356758 | 24 | 12 | 1.063378847 |
| HFD+FOS_Ppara $\alpha$   | 0.001020623 | 0.002956286 | 24 | 12 | 1.162961333 |
| <b>intestinal tissue</b> |             |             |    |    |             |
| LFD_Bmal1                | 1.74E-10    | 1.83E-09    | 20 | 4  | 0.694638619 |
| HFD_Bmal1                | 3.87E-13    | 9.57E-12    | 20 | 6  | 0.593041155 |
| HFD+FOS_Bmal1            | 6.12E-12    | 7.35E-11    | 20 | 6  | 0.730819684 |
| LFD_Clock                | 1.60E-05    | 6.70E-05    | 24 | 18 | 0.652635549 |
| HFD_Clock                | 6.12E-12    | 7.35E-11    | 20 | 0  | 0.442227471 |
| HFD+FOS_Clock            | 0.002770855 | 0.006845641 | 24 | 18 | 0.443886300 |
| LFD_Cd36                 | 0.632608834 | 0.830299094 | 20 | 8  | 1.068570929 |

|                                       |                 |                |    |    |             |
|---------------------------------------|-----------------|----------------|----|----|-------------|
| HFD_Cd36                              | 1               | 1              | 20 | 10 | 0.411301599 |
| HFD+FOS_Cd36                          | 0.069229071     | 0.129227599    | 24 | 16 | 0.743744529 |
| LFD_Mttp                              | 1               | 1              | 20 | 0  | 3.04796285  |
| HFD_Mttp                              | 0.296536049     | 0.444804074    | 20 | 18 | 0.619656835 |
| HFD+FOS_Mttp                          | 1               | 1              | 20 | 14 | 0.86059046  |
| <b><math>\alpha</math>-diversity</b>  |                 |                |    |    |             |
| LFD_Shannon                           | 0.174040719     | 0.298355518    | 24 | 6  | 1.043619403 |
| HFD_Shannon                           | 0.485556756     | 0.668635533    | 20 | 18 | 0.579704148 |
| HFD+FOS_Shannon                       | 0.12600042      | 0.22519224     | 20 | 8  | 0.647018203 |
| LFD_Simpson                           | 0.318942565     | 0.461916818    | 24 | 4  | 0.073988066 |
| HFD_Simpson                           | 0.255710585     | 0.397772022    | 20 | 16 | 0.014298973 |
| HFD+FOS_Simpson                       | 0.718773875     | 0.901149336    | 20 | 8  | 0.05394919  |
| <b>Genus-level relative abundance</b> |                 |                |    |    |             |
| HFD_g_Bifidobacterium                 | 0.003122858     | 0.007286668    | 24 | 22 | 0.956361922 |
| HFD+FOS_g_Bifidobacterium             | 0.203505754     | 0.328740064    | 20 | 18 | 7.59432683  |
| HFD_g_Akkermansia                     | 1               | 1              | 24 | 18 | 0.38890873  |
| HFD+FOS_g_Akkermansia                 | 1               | 1              | 20 | 18 | 5.798275606 |
| HFD_g_Absiella                        | 0.865628753     | 1              | 24 | 0  | 0.060104076 |
| HFD+FOS_g_Absiella                    | 1               | 1              | 20 | 12 | 2.899137803 |
| HFD_g_Allobaculum                     | 0.0419624359151 | 0.083924871830 | 20 | 6  | 0.190918830 |
| HFD+FOS_g_Allobaculum                 | 0.000687933     | 0.002222553376 | 20 | 10 | 1.520279579 |
| HFD_g_Desulfovibrio                   | 0.6535902375766 | 0.844639691637 | 24 | 6  | 0.519723484 |
| HFD+FOS_g_Desulfovibrio               | 0.0029468562002 | 0.007072454880 | 24 | 6  | 0.141421356 |

|                                  |                 |                |    |    |             |
|----------------------------------|-----------------|----------------|----|----|-------------|
| HFD_g_Erysipelatoclostridium     | 1               | 1              | 20 | 14 | 0.197989899 |
| HFD+FOS_g_Erysipelatoclostridium | 1               | 1              | 24 | 0  | 0.113137085 |
| HFD_g_Streptococcus              | 0.010820647     | 0.022723359    | 20 | 14 | 0.410121933 |
| HFD+FOS_g_Streptococcus          | 0.275480124     | 0.420733281    | 20 | 0  | 0.035355339 |
| HFD_g_Romboutsia                 | 0.006621442     | 0.014636871    | 20 | 14 | 0.494974747 |
| HFD+FOS_g_Romboutsia             | 1               | 1              | 20 | 2  | 0.014142136 |
| HFD_g_Oscillibacter              | 1               | 1              | 20 | 4  | 0.261629509 |
| HFD+FOS_g_Oscillibacter          | 0.060598878     | 0.118379204    | 20 | 8  | 0.091923882 |
| <b>SCFAs</b>                     |                 |                |    |    |             |
| LFD_Acetate in feces             | 0.160745182     | 0.281304068    | 20 | 2  | 27.77027533 |
| HFD_Acetate in feces             | 0.012037617     | 0.024662435    | 20 | 0  | 33.61476036 |
| HFD+FOS_Acetate in feces         | 0.592805095     | 0.790406793    | 24 | 6  | 56.78409339 |
| LFD_Propionate in feces          | 0.000785586     | 0.002356758    | 20 | 6  | 48.54360178 |
| HFD_Propionate in feces          | 0.865628753     | 1              | 24 | 6  | 4.359285022 |
| HFD+FOS_Propionate in feces      | 0.075614479     | 0.138078613    | 24 | 4  | 28.65201981 |
| LFD_Isobutyrate in feces         | 9.67E-10        | 9.02E-09       | 20 | 6  | 44.87960071 |
| HFD_Isobutyrate in feces         | 0.5550808139362 | 0.752044973720 | 24 | 6  | 2.799103406 |
| HFD+FOS_Isobutyrate in feces     | 0.0024557202210 | 0.006250924198 | 24 | 6  | 12.09192547 |
| LFD_Butyrate in feces            | 1.04E-07        | 6.26E-07       | 20 | 6  | 41.45384513 |
| HFD_Butyrate in feces            | 0.255710585     | 0.397772022    | 24 | 4  | 2.955328043 |
| HFD+FOS_Butyrate in feces        | 0.718773875     | 0.901149336    | 24 | 6  | 10.11112139 |
| LFD_Valerate in feces            | 2.65E-08        | 1.86E-07       | 20 | 6  | 45.38419918 |

|                               |                 |                |    |    |             |
|-------------------------------|-----------------|----------------|----|----|-------------|
| HFD_Valerate in feces         | 1               | 1              | 20 | 10 | 0.889420123 |
| HFD+FOS_Valerate in feces     | 0.342765656     | 0.488005341    | 24 | 4  | 3.665401137 |
| LFD_Acetate in plasma         | 1.89E-05        | 9.44E-05       | 24 | 20 | 20.36467529 |
| HFD_Acetate in plasma         | 0.0939806034396 | 0.156634339066 | 24 | 20 | 3.747665940 |
| HFD+FOS_Acetate in plasma     | 9.53E-06        | 7.15E-05       | 24 | 20 | 13.71787155 |
| LFD_Propionate in plasma      | 0.0399966386318 | 0.074993697434 | 24 | 20 | 3.535533905 |
| HFD_Propionate in plasma      | 0.1367731458395 | 0.205159718759 | 24 | 18 | 0.459619407 |
| HFD+FOS_Propionate in plasma  | 0.0212671146543 | 0.045572388545 | 24 | 20 | 4.772970773 |
| LFD_Isobutyrate in plasma     | 1               | 1              | 24 | 22 | 0.282842712 |
| HFD_Isobutyrate in plasma     | 0.537219042     | 0.671523802    | 24 | 22 | 0.212132034 |
| HFD+FOS_Isobutyrate in plasma | 0.892615301     | 0.985287694    | 20 | 4  | 0.141421356 |
| LFD_Butyrate in plasma        | 7.87E-09        | 1.18E-07       | 24 | 4  | 2.121320343 |
| HFD_Butyrate in plasma        | 0.3427656558847 | 0.467407712570 | 24 | 22 | 0.212132034 |
| HFD+FOS_Butyrate in plasma    | 0.0114291321736 | 0.028572830434 | 24 | 18 | 1.414213562 |
| LFD_Valerate in plasma        | 0.0031228575566 | 0.011710715837 | 20 | 4  | 1.060660171 |
| HFD_Valerate in plasma        | 0.9196018479751 | 0.985287694259 | 24 | 20 | 0.212132034 |
| HFD+FOS_Valerate in plasma    | 0.0108206471338 | 0.028572830434 | 20 | 4  | 0.424264068 |
